# Supplementary material for: Criminal Justice Contact and Treatment Utilization Among People With Mental Illness and Substance Use Disorders
Source: Atypon-hosted journal article supplement (doi:10.1176/appi.ps.201500381), 2016-06-15
Supplement: appi.ps.201500381.ds001.pdf [file appi.ps.201500381.ds001.pdf]

**Appendix. Sample characteristics (N = 8740)**

| Variables                     | Individuals without<br>criminal history<br>(n = 5034) |      | Individuals with criminal<br>history<br>(n = 3706) |      | $\chi^2$  | df |
|-------------------------------|-------------------------------------------------------|------|----------------------------------------------------|------|-----------|----|
|                               | Weighted<br>%                                         | SE   | Weighted<br>%                                      | SE   |           |    |
| Use of care                   |                                                       |      |                                                    |      | 118.09*** | 3  |
| Both treatment                | 6.03                                                  | .66  | 15.51                                              | 1.04 |           |    |
| Mental health treatment alone | 37.45                                                 | .86  | 29.04                                              | 1.16 |           |    |
| Substance use treatment alone | 2.78                                                  | .50  | 8.79                                               | .77  |           |    |
| None                          | 53.73                                                 | 1.05 | 46.65                                              | 1.45 |           |    |
| Severity of mental illness    |                                                       |      |                                                    |      | 21.76***  | 1  |
| Severe mental illness         | 26.57                                                 | .94  | 33.73                                              | 1.33 |           |    |
| Substance abuse or dependence |                                                       |      |                                                    |      | 37.55***  | 1  |
| Dependence                    | 63.56                                                 | 1.26 | 73.90                                              | 1.32 |           |    |
| Health                        |                                                       |      |                                                    |      | 90.03***  | 4  |
| Excellent                     | 15.68                                                 | .92  | 10.57                                              | .85  |           |    |
| Very good                     | 38.57                                                 | 1.35 | 26.80                                              | 1.19 |           |    |
| Good                          | 30.16                                                 | 1.09 | 36.16                                              | 1.23 |           |    |
| Fair                          | 12.01                                                 | .88  | 19.55                                              | .95  |           |    |
| Poor                          | 3.57                                                  | .48  | 6.92                                               | .86  |           |    |
| Insurance (yes)               | 79.13                                                 | 1.12 | 68.00                                              | 1.41 | 41.65***  | 1  |
| Sex                           |                                                       |      |                                                    |      | 100.81*** | 1  |
| Female (yes)                  | 57.19                                                 | 1.29 | 34.51                                              | 1.48 |           |    |
| Age                           |                                                       |      |                                                    |      | 79.36***  | 4  |
| 18-25                         | 33.45                                                 | .96  | 20.64                                              | .70  |           |    |
| 26-34                         | 25.92                                                 | 1.05 | 28.66                                              | 1.24 |           |    |
| 35-49                         | 26.29                                                 | 1.00 | 31.96                                              | 1.09 |           |    |
| 50-64                         | 11.24                                                 | .96  | 17.03                                              | 1.27 |           |    |
| 65+                           | 3.11                                                  | .79  | 1.71                                               | .50  |           |    |
| Race                          |                                                       |      |                                                    |      | 7.87***   | 2  |
| Non-Latino White              | 74.60                                                 | 1.07 | 73.47                                              | 1.35 |           |    |
| Black                         | 10.24                                                 | .70  | 13.26                                              | .87  |           |    |

---

|        |       |     |       |     |
|--------|-------|-----|-------|-----|
| Latino | 15.16 | .84 | 13.27 | .99 |
|--------|-------|-----|-------|-----|

*Note.* \*  $p < .05$ , \*\*  $p < .01$ , \*\*\*  $p < .001$ .
